# Supplementary material for: Butyrophilin-like 2 regulates site-specific adaptations of intestinal γδ intraepithelial lymphocytes
Source: PubMed Central journal article supplement (PMC8313535; doi:10.1038/s42003-021-02438-x), 2021-07-26
Supplement: 42003_2021_2438_MOESM2_ESM.pdf [file 42003_2021_2438_MOESM2_ESM.pdf]

## **Description of Additional Supplementary Files**

**File name:** Supplementary Data 1

**Description:** This document contains the source data for the graphs and charts from both main figures and supplementary figures. All information is contained within one excel file, with each tab representing a different figure.
